# Supplementary material for: Effect of gastrointestinal symptoms and skipping breakfast on anxiety and depression in quarantined Chinese college students during the COVID-19 pandemic: A cross sectional survey
Source: Research Square preprint supplement (doi:10.21203/rs.3.rs-2452500/v1), 2023-01-16
Supplement: Supplementary file 1 [file 08d449b73858eb79bcbe1d3d.docx]

Table 1. Characteristics of quarantined college students by anxiety and depression status.

|  |  |  | GAD-7 | | | PHQ-9 | | |
| --- | --- | --- | --- | --- | --- | --- | --- | --- |
| Variables | Category | Total | Non-anxiety | Anxiety | P value | Non-depression | Depression | P value |
| Total (n, %) |  | 384 | 166(42.2) | 218(56.8) |  | 143(37.2) | 241(62.8) |  |
| Age (years), (Mean ± SD) |  | 25.67±3.2 | 25.69±2.9 | 25.66±3.5 | 0.923 | 25.97±3.3 | 25.50±3.2 | 0.169 |
| Sex (n, %) |  |  |  |  | 0.119 |  |  | 0.210 |
|  | Man | 118(30.7) | 58(49.2) | 108(50.8) |  | 54(45.8) | 64(54.2) |  |
|  | Woman | 266(69.3) | 108(40.6) | 158(59.4) |  | 89(54.2) | 177(66.5) |  |
| Quarantine duration (days) (Mean ± SD) |  | 48.83±13.9 | 45.11±15.4 | 51.66±12.0 | <0.001 | 44.40±15.2 | 51.45±12.4 | <0.001 |
| Marital status (n, %) |  |  |  |  | 0.779 |  |  | 0.489 |
|  | Unmarried | 338(88.0) | 147(43.5) | 191(56.5) |  | 128(37.9) | 210(62.1) |  |
|  | Married | 46(12.0) | 19(41.3) | 27(58.3) |  | 15(32.6) | 31(67.4) |  |
| Education level (n, %) |  |  |  |  | 0.072 |  |  | 0.448 |
|  | Undergraduate | 60(15.6) | 34(56.7) | 26(43.7) |  | 23(38.3) | 37(61.7) |  |
|  | Postgraduate | 190(49.6) | 78(41.1) | 112(58.9) |  | 65(34.2) | 125(65.8) |  |
|  | Doctoral student | 134(34.9) | 54(40.3) | 80(58.7) |  | 55(41.0) | 79(59.0) |  |
| BMI1 (Mean ± SD) |  | 21.28±2.8 | 21.21±2.7 | 21.27±2.9 | 0.889 | 21.40±2.7 | 21.22±2.8 | 0.543 |
| Skipping breakfast (n, %) |  |  |  |  | 0.003 |  |  | 0.031 |
|  | No | 117(30.5) | 64(54.7) | 53(45.3) |  | 53(45.3) | 64(54.7) |  |
|  | Yes | 267(69.5) | 102(38.2) | 165(61.8) |  | 90(33.7) | 177(66.3) |  |
| Regular physical exercise (n, %) |  |  |  |  | 0.430 |  |  | 0.127 |
|  | No | 210(54.7) | 81(38.6) | 129(61.4) |  | 71(33.8) | 139(66.2) |  |
|  | Yes | 174(45.3) | 85(48.9) | 89(51.1) |  | 72(41.4) | 102(58.6) |  |
| Positive attitude towards COVID-19 (n, %) |  |  |  |  | 0.500 |  |  | 0.525 |
|  | No | 188(49.0) | 78(49.0) | 110(58.5) |  | 67(35.6) | 121(64.4) |  |
|  | Yes | 196(51.0) | 88(51.0) | 108(55.1) |  | 76(38.8) | 120(61.2) |  |
| Stomachache or abdominal pain  (n, %) |  |  |  |  | 0.150 |  |  | <0.001 |
|  | No | 254(66.1) | 121 (47.6) | 133(52.4) |  | 111(43.7) | 143(56.3) |  |
|  | Yes | 130(33.9) | 45(34.6) | 85(65.4) |  | 32(24.6) | 98(75.4) |  |
| Nausea or dyspepsia (n, %) |  |  |  |  | 0.310 |  |  | 0.011 |
|  | No | 226(58.9) | 108(47.8) | 118(52.2) |  | 96(42.5) | 130(57.5) |  |
|  | Yes | 158(41.1) | 118(36.7) | 100(63.3) |  | 47(29.7) | 111(70.3) |  |
| Constipation or diarrhea (n, %) |  |  |  |  | 0.780 |  |  | 0.630 |
|  | No | 233(60.7) | 141(43.8) | 108(56.2) |  | 89(38.2) | 114(61.8) |  |
|  | Yes | 151(39.3) | 68(42.4) | 49(57.6) |  | 54(35.8) | 97(64.2) |  |
| GAD-7 scores (Mean ± SD) |  | 5.84±4.9 | 1.59±1.4 | 9.08±4.1 | <0.001 | 2.35±2.6 | 7.91±4.8 | <0.001 |
| PHQ-9 scores (Mean ± SD) |  | 7.47±5.7 | 3.62±3.2 | 10.4±5.4 | <0.001 | 2.21±1.6 | 10.59±4.9 | <0.001 |

Abbreviations: SD, standard deviation; GAD-7, Generalized Anxiety Disorder Questionnaire; PHQ-9, Patient Health Questionnaire.

Table 2. Univariate and multivariate analyses of the anxiety symptoms among the quarantined college students.

| Variables | Category |  | Unadjusted  OR  (95% CI) | P value | Adjusted  OR  (95% CI) | P value |
| --- | --- | --- | --- | --- | --- | --- |
| Age |  |  | 0.997(0.937-1.061) | 0.932 | 1.018(0.948-1.092) | 0.631 |
| Sex |  |  |  |  |  |  |
|  | Man | Reference |  |  |  |  |
|  | Woman |  | 1.414(0.914-2.187) | 0.119 | 0.613(0.356-1.055) | 0.077 |
| Quarantine duration |  |  | 1.036(1.020-1.052) | <0.001 | 1.039(1.021-1.057) | <0.001 |
| Marital status |  |  |  |  |  |  |
|  | Unmarried | Reference |  |  |  |  |
|  | Married |  | 1.094(0.585-2.043) | 0.779 | 0.989(0.493-1.984) | 0.976 |
| Education level |  |  |  |  |  |  |
|  | Undergraduate | Reference |  |  |  |  |
|  | Postgraduate |  | 1.878(1.044-3.376) | 0.035 | 2.304(1.188-4.467) | 0.014 |
|  | Doctoral student |  | 1.937(1.046-3.588) | 0.035 | 2.511(1.257-5.013) | 0.009 |
| BMI1 |  |  | 0.995(0.926-1.069) | 0.890 | 1.020(0.932-1.117) | 0.663 |
| Skipping breakfast |  |  |  |  |  |  |
|  | No | Reference |  |  |  |  |
|  | Yes |  | 1.953(1.258-3.033) | 0.003 | 2.329(1.439-3.770) | 0.001 |
| Regular physical exercise |  |  |  |  |  |  |
|  | No | Reference |  |  |  |  |
|  | Yes |  | 0.657(0.438-0.988) | 0.043 | 0.579(0.370-0.904) | 0.017 |
| Positive attitude towards COVID-19 |  |  |  |  |  |  |
|  | No | Reference |  |  |  |  |
|  | Yes |  | 0.870(0.581-1.304) | 0.500 | 0.432(0.245-0.763) | 0.004 |
| Stomachache or abdominal pain |  |  |  |  |  |  |
|  | No | Reference |  |  |  |  |
|  | Yes |  | 1.718(1.110-2.661) | 0.015 | 2.071(1.135-3.780) | 0.018 |
| Nausea or dyspepsia |  |  |  |  |  |  |
|  | No | Reference |  |  |  |  |
|  | Yes |  | 1.578(1.041-2.391) | 0.031 | 1.810(1.009-3.249) | 0.047 |
| Constipation or diarrhea |  |  |  |  |  |  |
|  | No | Reference |  |  |  |  |
|  | Yes |  | 1.058(0.700-1.601) | 0.788 | 0.899(0.534-1.514) | 0.689 |

Abbreviations: OR, odds ratio; CI, confidential interval; GAD-7, Generalized Anxiety Disorder Questionnaire; PHQ-9, Patient Health Questionnaire. Note: Confounding variables include: age, sex (man/woman), quarantine duration, marital status (unmarried/married), education level (undergraduate/ postgraduate/ doctoral student), BMI1, skipping breakfast(yes/no), regular physical exercise(yes/no), positive attitude towards COVID-19(yes/no), stomachache or abdominal pain(yes/no), nausea or dyspepsia(yes/no), and constipation or diarrhea(yes/no).

Table 3. Univariate and multivariate analyses of the depression symptoms among the quarantined college students.

| Variables | Category |  | Unadjusted  OR  (95% CI) | P value | Adjusted  OR  (95% CI) | P value |
| --- | --- | --- | --- | --- | --- | --- |
| Age |  |  | 0.956(0.897-1.019) | 0.167 | 0.964(0.897-1.036) | 0.323 |
| Sex |  |  |  |  |  |  |
|  | Man | Reference |  |  |  |  |
|  | Woman |  | 1.678(1.078-2.613) | 0.022 | 1.800(0.037-3.123) | 0.037 |
| Quarantine duration |  |  | 1.038(1.022-1.055) | <0.001 | 1.039(1.021-1.057) | <0.001 |
| Marital status |  |  |  |  |  |  |
|  | Unmarried | Reference |  |  |  |  |
|  | Married |  | 1.260(0.655-2.424) | 0.489 | 1.206(0.582-2.496) | 0.615 |
| Education level |  |  |  |  |  |  |
|  | Undergraduate | Reference |  |  |  |  |
|  | Postgraduate |  | 1.195(0.656-2.179) | 0.560 | 1.334(0.674-2.638) | 0.408 |
|  | Doctoral student |  | 0.893(0.478-1.666) | 0.722 | 0.995(0.493-2.009) | 0.989 |
| BMI1 |  |  | 0.978(0.908-1.052) | 0.547 | 1.037(0.945-1.139) | 0.445 |
| Skipping breakfast |  |  |  |  |  |  |
|  | No | Reference |  |  |  |  |
|  | Yes |  | 1.629(1.045-2.538) | 0.031 | 1.945(1.187-3.186) | 0.008 |
| Regular physical exercise |  |  |  |  |  |  |
|  | No | Reference |  |  |  |  |
|  | Yes |  | 0.724(0.478-1.097) | 0.127 | 0.607(0.382-0.964) | 0.034 |
| Positive attitude towards COVID-19 |  |  |  |  |  |  |
|  | No | Reference |  |  |  |  |
|  | Yes |  | 0.874(0.578-1.323) | 0.525 | 0.380(0.212-0.682) | 0.001 |
| Stomachache or abdominal pain |  |  |  |  |  |  |
|  | No | Reference |  |  |  |  |
|  | Yes |  | 2.377(1.486-3.803) | <0.001 | 3.136(1.656-5.941) | <0.001 |
| Nausea or dyspepsia |  |  |  |  |  |  |
|  | No | Reference |  |  |  |  |
|  | Yes |  | 1.744(1.133-2.684) | 0.011 | 1.892(1.032-3.470) | 0.039 |
| Constipation or diarrhea |  |  |  |  |  |  |
|  | No | Reference |  |  |  |  |
|  | Yes |  | 1.110(0.726-1.698) | 0.630 | 0.791(0.461-1.359) | 0.396 |

Abbreviations: OR, odds ratio; CI, confidential interval; GAD-7, Generalized Anxiety Disorder Questionnaire; PHQ-9, Patient Health Questionnaire. Note: Confounding variables include: age, sex (man/woman), quarantine duration, marital status (unmarried/married), education level (undergraduate/ postgraduate/ doctoral student), BMI1, skipping breakfast(yes/no), regular physical exercise(yes/no), positive attitude towards COVID-19(yes/no), stomachache or abdominal pain(yes/no), nausea or dyspepsia(yes/no), and constipation or diarrhea(yes/no).
